# Supplementary material for: Predictive models for anti-tubercular molecules using machine learning on high-throughput biological screening datasets
Source: Springer Nature journal article supplement (doi:10.1186/1756-0500-4-504), 2011-11-18
Supplement: Additional file 4 [file 1756-0500-4-504-s4.doc]

**Additional Table** Various descriptors calculated for each dataset

| Descriptor category* | Description | Division |
| --- | --- | --- |
| 1.Pharmacophore fingerprints (147) | based on bioisosteric principles | Atom/group bearing formal negative charge  Atom/group bearing formal positive charge  Hydrogen-bond donor  Hydrogen-bond acceptor  Aromatic center  Hydrophobic center |
| 2.Weighted Burden  Number (24) | based on burden  connectivity matrix | Electro negativity, Gasteiger partial charge or atomic lipophilicity, XlogP |
| 3.Properties (8) | useful for judging the drug-like nature of a molecule | XlogP, polar surface area,  number of rotatable bonds, H-bond donors, H-bond acceptors, molecular weight, blood-brain indicator and bad group indicator |

* Values in brackets depict the number of descriptors calculated in each category.
